# Supplementary material for: Body site microbiota of Magellanic and king penguins inhabiting the Strait of Magellan follow species-specific patterns
Source: PeerJ journal article supplement (doi:10.7717/peerj.16290), 2023-11-02

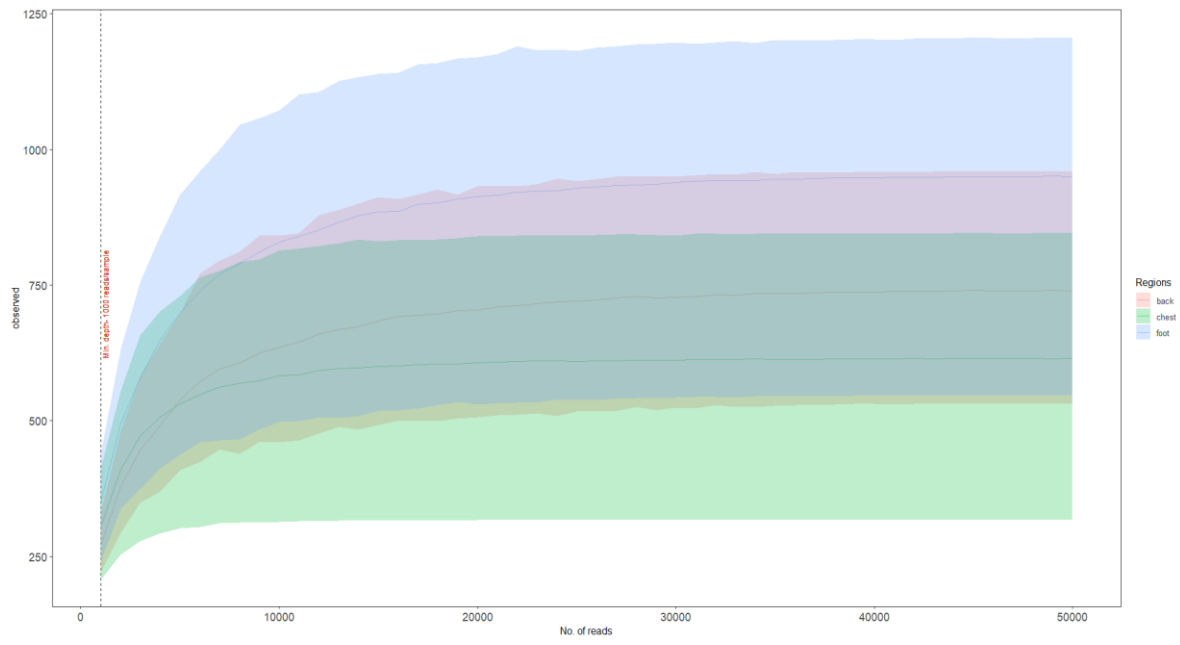

Supplement: FigS1.pdf [file FigS1.pdf]
