# Supplementary material for: Body site microbiota of Magellanic and king penguins inhabiting the Strait of Magellan follow species-specific patterns
Source: PeerJ journal article supplement (doi:10.7717/peerj.16290), 2023-11-02
Supplement: FigS3.pdf [file FigS3.pdf]

Psychrobacter sequences associated to King penguin body sites

Psychrobacter sequences associated to Magellanic penguin samples

**A**

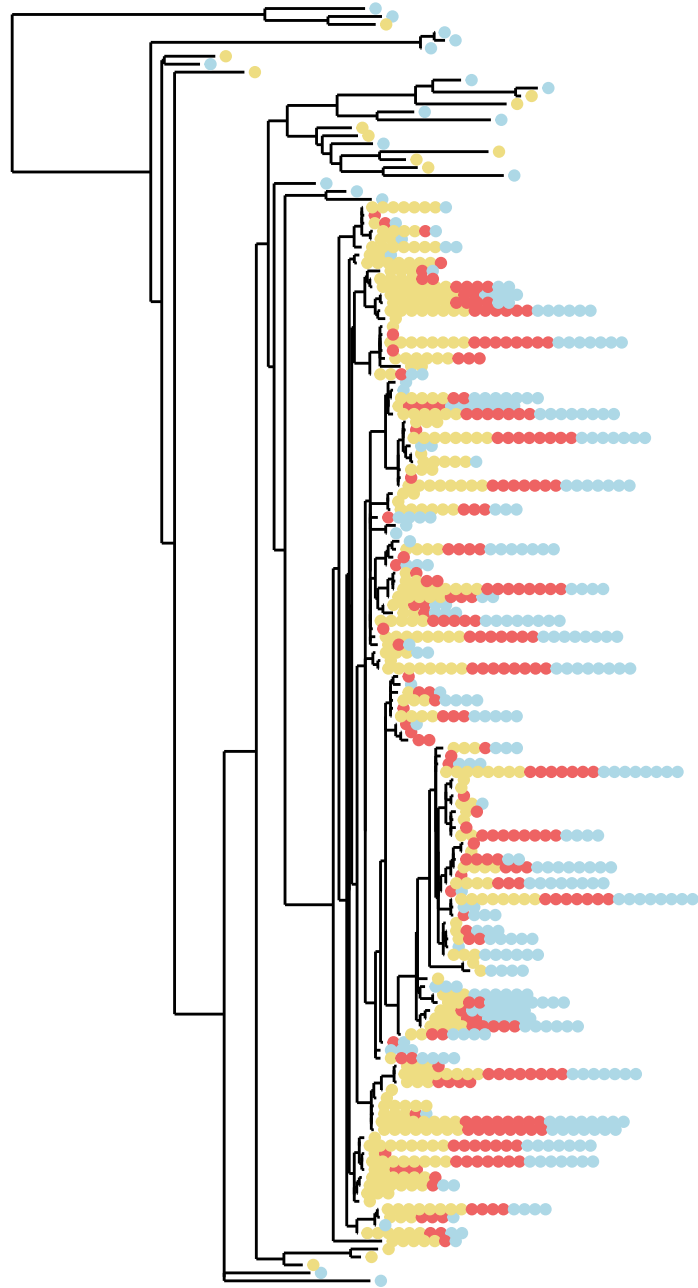

Regions

- back
- chest
- foot

**B**

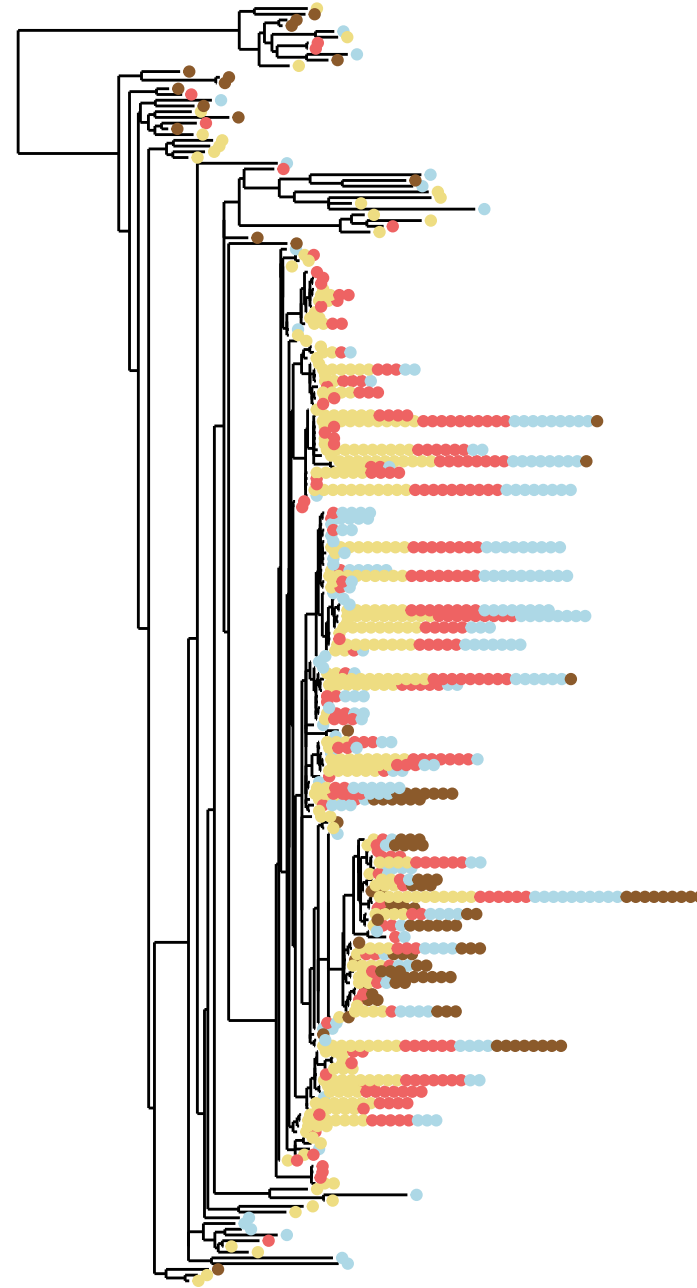

Regions

- back
- chest
- foot
- nest
